# Supplementary material
Source: PubMed Central journal article supplement (PMC4466225)
Supplement: NIHMS695231-supplement-Figure_S1.pdf [file NIHMS695231-supplement-Figure_S1.pdf]

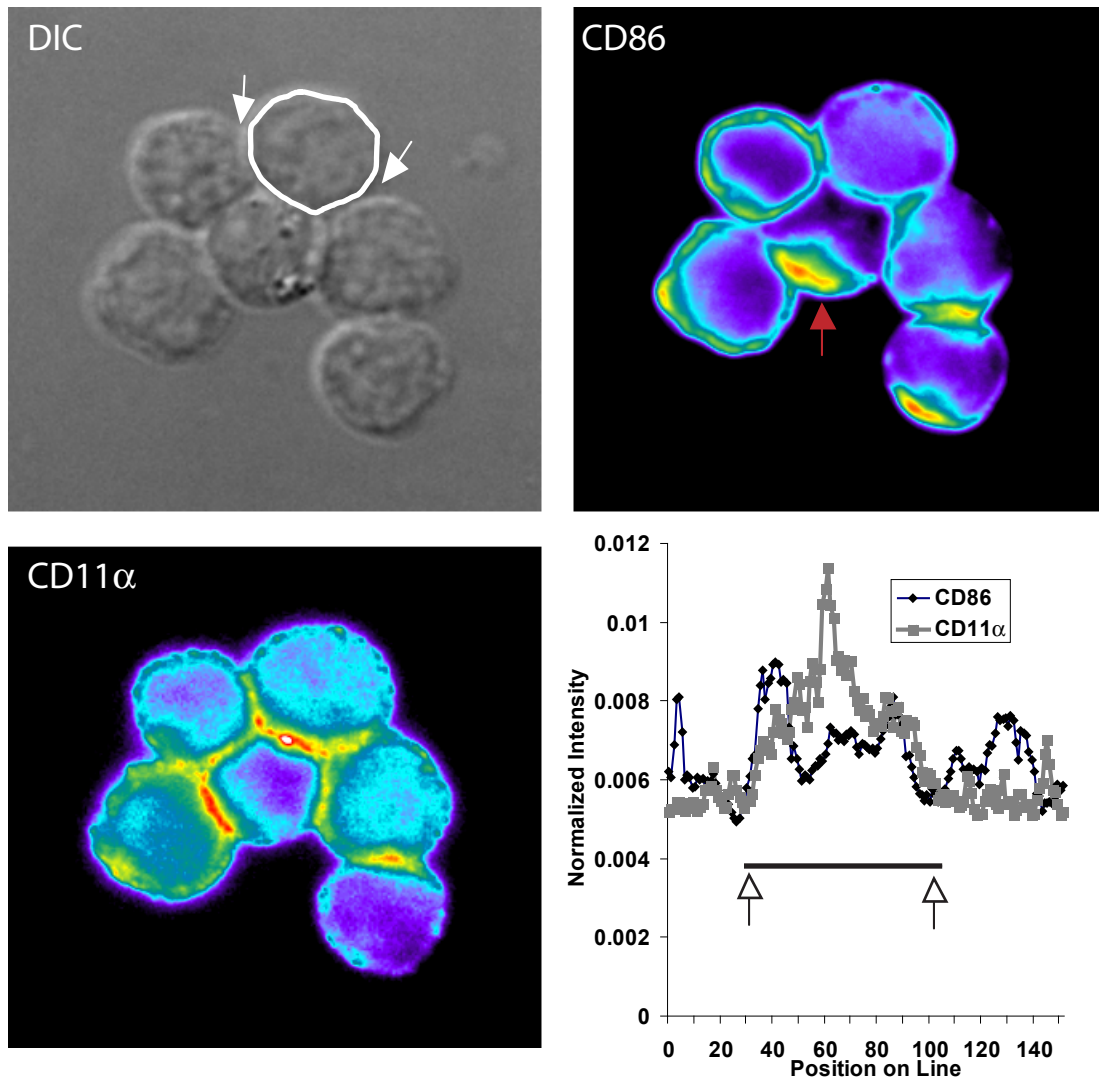

Sabatos, Doh et al.

### Supplementary Figure 1. Accumulation of LFA-1 at T-T Junctions

A. Purified WT B6 CD4<sup>+</sup> T cells ( $5 \times 10^5$ ) were stimulated for 19h with PMA and ionomycin. Permeabilized clusters fixed to slides were stained with anti-LFA-1 antibody with donkey-anti-rat-rhodamine for detection and CD86-FITC. Images are shown on a pseudocolor scale. A linescan surrounding the top-right cell was measured for CD86 and for LFA-1 and normalized values are plotted in the graph on the right. The region between the arrows (representing the primary contact region) demonstrates enrichment of LFA-1 above the CD86 level, particularly at the central junction. Note similar enrichment of LFA-1 at other T-T junctions, relative to CD86.
